# Supplementary material for: Factors Associated with Underreporting of Adverse Drug Reactions by Health Care Professionals: A Systematic Review Update
Source: PubMed Central journal article supplement — Drug Saf. 2023 Jun 6;46(7):625–36. doi: 10.1007/s40264-023-01302-7 (PMC10279571; doi:10.1007/s40264-023-01302-7), 2023-06-06
Supplement: 40264_2023_1302_MOESM1_ESM.pdf [file 40264_2023_1302_MOESM1_ESM.pdf]

# *Factors Associated with Underreporting of Adverse Drug Reactions by Health Care Professionals: A Systematic Review Update*

---

## **Authors:**

- Patricia García-Abeijon (1)
- Catarina Costa (2) ORCID: 0000-0002-8247-0422
- Margarita Taracido (1,3,4) ORCID: 0000-0003-1243-8352
- Maria Teresa Herdeiro (5). ORCID: 0000-0002-0500-4049
- Carla Torre (2,6) ORCID: 0000-0002-5542-9993
- Adolfo Figueiras (1,3,4). ORCID: 0000-0002-5766-8672

## **Affiliations:**

1. Department of Preventive Medicine and Public Health, University of Santiago de Compostela, Santiago de Compostela, Spain.
2. Faculdade de Farmácia da Universidade de Lisboa, Lisbon, Portugal.
3. Health Research Institute of Santiago de Compostela (IDIS), University of Santiago de Compostela, Santiago de Compostela, Spain.
4. Consortium for Biomedical Research in Epidemiology and Public Health (CIBER Epidemiology and Public Health - CIBERESP), Madrid, Spain.
5. Department of Medical Sciences, Institute of Biomedicine - iBiMED, University of Aveiro, Aveiro, Portugal.
6. Laboratory of Systems Integration Pharmacology, Clinical and Regulatory Science, Research Institute for Medicines (iMED.Ulissboa), Lisbon, Portugal.

## **Name and address for correspondence and reprint requests**

Adolfo Figueiras  
Dpto. de Medicina Preventiva y Salud Pública.  
Praza do Seminario de Estudos Galegos, s/n,  
15705 Santiago de Compostela Santiago de Compostela (A Coruña)  
SPAIN

e-mail: [adolfo.figueiras@usc.es](mailto:adolfo.figueiras@usc.es)

---

**Table S1.** Articles that analyze the influence of personal and professional factors in the notification of adverse drug reactions: methods description

**Table S2.** Articles that analyse the influence of personal and professional factors and attitudes of health professionals in the reporting of adverse drug reactions

**Table S3:** Influential factors in adverse drug reactions underreporting.

**Table S1.** Articles that analyze the influence of personal and professional factors in the notification of adverse drug reactions: methods description

| AUTHOR (Publication Year)             | COUNTRY      | STUDY POPULATION | WORKPLACE | SAMPLE SIZE | SURVEY DISTRIBUTION | SCALE          | AXIS tool not fulfilled criteria <sup>d</sup> |
|---------------------------------------|--------------|------------------|-----------|-------------|---------------------|----------------|-----------------------------------------------|
|                                       |              |                  |           |             |                     |                |                                               |
| Haines et al. [1] (2020)              | South Africa | 1,2,3            | B         | 218 d       | 218 d               | NM             | 7,14,15                                       |
| Gidey et al. [2] (2020)               | Ethiopia     | 1,2,3            | A         | 362 d       | 362 d               | MC, FT         | 14                                            |
| Nadew et al. [3] (2020)               | Ethiopia     | 1                | A         | 422 d       | 422 d               | Likert         | 6,14                                          |
| Melo et al. [4] (2020)                | Brazil       | 1,2,3,6          | NM        | NM f        | NM f                | NM             | 3,5,6,7,14,20                                 |
| Braiki et al. [5] (2019) c            | Tunisia      | 1,3,6            | A         | 150 d       | 150 d               | Likert         | 5,6,7,10,11,14                                |
| Alemu and Biru [6] (2019)             | Ethiopia     | 1,2,3,4,6        | A         | 120 d       | 120 d               | MC, Likert     | 5,6,7,14,15                                   |
| Le et al. [7] (2019)                  | Vietnam      | 1,2,3            | A         | 2600 d      | 2600 d              | Likert         | 3,6,7,14,15                                   |
| Kopciuch et al. [8] (2019)            | Poland       | 2                | C         | 899 d       | 899 d               | NM             | 7,14                                          |
| Hughes and Weiss [9] (2019)           | UK           | 2                | C         | 713 a       | 713 a               | FT, Likert     | 3,6,7,11,14,18                                |
| Danekhu et al. [10] (2019)            | Nepal        | 1,2,3            | A         | 215 d       | 215 d               | Likert         | 5,7,14,15                                     |
| Adisa and Omitogun [11] (2019) b      | Nigeria      | 1,3,6            | B         | 80 d        | 80 d                | Likert         | 14                                            |
| Ergün et al. [12] (2018)              | Turkey       | 2,3              | A         | 783 d       | 783 d               | MC, FT         | 3,14                                          |
| Thompson et al. [13] (2018)           | UK           | 2,3              | NM        | NM f        | NM f                | NM             | 3,4,5,6,7,13,14,20                            |
| Li et al. [14] (2018)                 | Australia    | 2                | C         | 263 f       | 263 f               | MC, FT, Likert | 5,6,7,14                                      |
| Seid et al. [15] (2018)               | Ethiopia     | 1,2,3            | B         | 102 d       | 102 d               | MC, Likert     | 3,4,5,14                                      |
| Bahnassi and Al-Harbi [16] (2018)     | Syria        | 2                | A,C       | 656 d       | 656 d               | MC, FT, Likert | 7,11,14                                       |
| Lemay et al. [17] (2018)              | Kuwait       | 1,2              | B         | 583 d       | 583 d               | NM             | 7,14,19                                       |
| Terblanche et al. [18] (2017)         | South Africa | 1,2,3            | A         | 200 d       | 200 d               | MC, FT         | 6,7,9,14                                      |
| Hajj et al. [19] (2017)               | Lebanon      | 2                | C         | 2000 d      | 2000 d              | NM             | 7,14,15                                       |
| Hammour et al. [20] (2017)            | Jordan       | 1,3              | A         | 670 NM      | 670 NM              | Likert         | 6,7,14,15                                     |
| Cheema et al. [21] (2017)             | UK           | 2                | C         | 230 a,f     | 230 a,f             | MC             | 6,7,14,15                                     |
| Gurmesa and Dedefo [22] (2016)        | Ethiopia     | 1,2,3,4          | A,D       | 133 NM      | 133 NM              | NM             | 7,10,11,14,18                                 |
| Almandil [23] (2016)                  | Saudi Arabia | 1,2,3,6          | A         | 400 c,f     | 400 c,f             | NM             | 3,7,14,15                                     |
| Stergiopoulos et al. [24] (2016)      | USA          | 1,2,3            | A,C,D     | 284 f       | 284 f               | Likert         | 3,6,7,9,11,14,15,20                           |
| Peymani et al. [25] (2016)            | Iran         | 1                | A,D       | 350 d       | 350 d               | MC, FT         | 6,11,14,15,18                                 |
| Amin et al. [26] (2016)               | Bangladesh   | 2,6              | C         | 292 d       | 292 d               | Likert         | 6,14                                          |
| Yu et al. [27] (2016)                 | Korea        | 2                | C         | 1315 d,f    | 1315 d,f            | Likert         | 6,14                                          |
| Marques et al. [28] (2016)            | Portugal     | 3                | A,B       | 1325 a      | 1325 a              | VAS            | 14,15                                         |
| Cerruti et al. [29] (2016)            | Canada       | 2                | A         | 252 f       | 252 f               | MC, FT         | 6,7,10,11,14                                  |
| Katusiime et al. [30] (2015)          | Uganda       | 1,2,3,5          | A         | 289 d       | 289 d               | NM             | 7,14                                          |
| Angelis et al. [31] (2015)            | Italy        | 3                | A         | 773 NM      | 773 NM              | MC, Likert     | 3,5,6,7,10,11,14                              |
| Alshammari et al. [32] (2015)         | Saudi Arabia | 1,2,3            | A         | NM d        | NM d                | NM             | 3,6,7,14,15                                   |
| Nde et al. [33] (2015)                | Cameroon     | 1,2,3            | O         | 200 NM      | 200 NM              | NM             | 6,9,11,14,16,18,20                            |
| Liu et al. [34] (2015)                | China        | 2                | A         | 558 a       | 558 a               | MC, FT, Likert | 7,14                                          |
| Tandon et al. [35] (2015)             | India        | 1,2,3,5          | A         | 300 d       | 300 d               | NM             | 3,5,6,7,14,18                                 |
| Sabbiah et al. [36] (2014)            | Ghana        | 1                | A         | 300 d       | 300 d               | NM             | 3,11,14,15,17,18                              |
| Kiguba et al. [37] (2014)             | Uganda       | 1,2,3            | A,B,C     | 2000 d      | 2000 d              | Likert         | 6,7,14                                        |
| Affifi et al. [38] (2014)             | Iran         | 2                | A,C       | 120 d       | 120 d               | MC, FT         | 3,6,7,11,14,15                                |
| Elkalmi et al. [39] (2014)            | Malaysia     | 2                | C         | 470 d       | 470 d               | MC, FT, Likert | 3,5,7,14,15,19,20                             |
| Wilbur [40] (2013)                    | Qatar        | 2                | NM        | 568 f       | 568 f               | NM             | 7,10,11,14                                    |
| Sanghavi et al. [41] (2013) a         | India        | 1,5              | A         | 220 d       | 220 d               | NM             | 3,6,7,10,11,14,19                             |
| Stoyanova et al. [42] (2013) a        | Bulgaria     | 1                | A,B       | 135 d       | 135 d               | NM             | 7,14,20                                       |
| Yip et al. [43] (2013)                | UK           | 1                | NM        | 430 a       | 430 a               | FT, Likert     | 7,11,13,14,15,18,19                           |
| Santosh et al. [44] (2013)            | Nepal        | 1,2,3            | A         | 450 d       | 450 d               | Likert         | 3,5,6,7,14,15                                 |
| Stewart et al. [45] (2013)            | UK           | 2,3              | NM        | 3351 f      | 3351 f              | FT, Likert     | 3,7,13,14,15                                  |
| Agarwal et al. [46] (2013)            | Malaysia     | 1                | D         | 238 d       | 238 d               | NM             | 3,7,14,18                                     |
| Pimpalkhute et al. [47] (2012)        | India        | 5                | A         | 90 d        | 90 d                | NM             | 3,6,7,9,10,11,14,18                           |
| Biagi et al. [48] (2012) a            | Italy        | 1                | O         | 737 a       | 737 a               | NM             | 7,9,10,11,13,14,20                            |
| Prakasam et al. [49] (2012)           | India        | 2                | C         | 650 d       | 650 d               | MC             | 3,7,9,10,11,14,18,20                          |
| Scicchitano et al. [50] (2012)        | Italy        | 1,2              | NM        | 1048 d,f    | 1048 d,f            | NM             | 3,5,6,7,9,10,11,14,15,18,20                   |
| Chopra et al. [51] (2011)             | India        | 1                | A         | 100 NM      | 100 NM              | MC             | 3,5,7,9,10,11,14,15,19,20                     |
| Palaian et al. [52] (2011)            | Nepal        | 1,2,3            | A         | 185 d       | 185 d               | NM             | 5,6,7,14,20                                   |
| Oreagba et al. [53] (2011)            | Nigeria      | 2                | C         | 400 d       | 400 d               | Likert         | 7,14,15,18                                    |
| Moumtzoglou [54] (2010)               | Greece       | 1                | A         | 350 c       | 350 c               | MC, Likert     | 7,14,19,20                                    |
| Gavaza et al. [55] (2010)             | USA          | 2                | A,C       | 1500 a      | 1500 a              | FT             | 3,5,6,9,10,11,14,19                           |
| Su et al. [56] (2010)                 | China        | 2                | A         | 288 b       | 288 b               | MC             | 3,5,6,7,11,14,19                              |
| Ohaju-Obodo and Iribhogbe [57] (2010) | Nigeria      | 5                | A         | 350 NM      | 350 NM              | NM             | 7,9,11,14,16,18,19,20                         |
| Oshikoya et al. [58] (2009)           | Nigeria      | 1                | A         | 120 c       | 120 c               | NM             | 3,5,6,7,14                                    |
| Elnour et al. [59] (2009)             | Sudan        | 1,2,3,5          | A,C       | 600 NM      | 600 NM              | NM             | 14,19                                         |
| Vessal et al. [60] (2009)             | Iran         | 2                | C         | 200 d       | 200 d               | NM             | 5,6,7,10,11,14,19,20                          |
| Ekman and Bäckström [61] (2008)       | Sweden       | 1                | A         | 1201 a      | 1201 a              | NM             | 7,14,19,20                                    |
| Okezie and Olufunmilayo [62] (2008)   | Nigeria      | 5                | A         | 211 d       | 211 d               | NM             | 7,14,18,19                                    |
| Toklu and Uysal [63] (2008)           | Turkey       | 2                | C         | 411 b       | 411 b               | FT, Likert     | 7,14                                          |
| Gossell-Williams et al. [64] (2008)   | Jamaica      | 2                | C         | 102 d       | 102 d               | NM             | 2,3,7,9,10,11,14,15,18,20                     |
| Irujo et al. [65] (2007)              | Spain        | 2                | C         | 80 d        | 80 d                | MC, FT, Likert | 3,7,14                                        |

a) Pre-intervention data (reference data).

b) Article with professionals and patients' information (only the data on professionals is collected)

c) Did not have a Pharmacovigilance System implemented at the time of study.

d) AXIS tool: criteria not met.

1-Doctor, 2-Pharmacist, 3-Nurse, 4-Administrators, 5-Residents, 6-Other health professionals

A-Hospital, B-Primary Care, C-Pharmacy, D-Private Clinic, O-Others, U-University, NM-Not mentioned

a-Postcard, b-Interviewer, c-Internal mail, d-Directly Administered, NM-Not Mentioned, f-Internet

MC-Multiple-choice, FT-Free Text, VAS-Visual Analogue Scale, Likert, NM-Not Mentioned

**Table S2.** Articles that analyse the influence of personal and professional factors and attitudes of health professionals in the reporting of adverse drug reactions

| AUTHOR                                | RESPONSE RATE (%) | PERSONAL AND PROFESSIONAL FACTORS                                       | REASONS TO NOT REPORTING ADRs                                                   |
|---------------------------------------|-------------------|-------------------------------------------------------------------------|---------------------------------------------------------------------------------|
| Haines et al. [1] (2020)              | 91.7%             |                                                                         | fr, ig, in, is, le, others                                                      |
| Gidey et al. [2] (2020)               | 84.8%             | Years of experience, Training                                           | co, di, in, le                                                                  |
| Nadew et al. [3] (2020)               | 96.0%             | Sex, Qualification, Years of experience                                 | di, la, ig, in, le, Obligation, Confidentiality                                 |
| Melo et al. [4] (2020)                | NM                | Region                                                                  | ig, le, uf, others, Information                                                 |
| Braiki et al. [5] (2019) c            | 100.0%            |                                                                         | la, ig, le                                                                      |
| Alemu and Biru [6] (2019)             | 95.0%             | Profession                                                              | co, fe, la, ig, in, is, le, uf, others, Obligation                              |
| Le et al. [7] (2019)                  | 80.4%             | Training                                                                | fr, la, ig, le, uf                                                              |
| Kopciuch et al. [8] (2019)            | 58.0%             | Age, Qualification, Years of experience                                 | fr, ig, is, le, uf, others                                                      |
| Hughes and Weiss [9] (2019)           | 52.0%             |                                                                         | di, ig, is, le, others, Obligation, Information                                 |
| Danekhu et al. [10] (2019)            | 100.0%            |                                                                         | ig, others, Information                                                         |
| Adisa and Omitogun [11] (2019) b      | 100.0%            | Qualification, Years of experience                                      | co, la, ig, uf                                                                  |
| Ergün et al. [12] (2018)              | 61.6%             |                                                                         | co, di, fe, la, ig, in, is, le, uf, others, Information                         |
| Thompson et al. [13] (2018)           | 20.0%             | Profession, Training, Years of experience                               | co, di, le, others, Information                                                 |
| Li et al. [14] (2018)                 | NM                |                                                                         | fr, le, others                                                                  |
| Seid et al. [15] (2018)               | NM                | Profession, Training                                                    | co, di, ig, le, uf, others                                                      |
| Bahnassi and Al-Harbi [16] (2018)     | 77.0%             |                                                                         | co, la, ig, le, uf, others                                                      |
| Lemay et al. [17] (2018)              | 83.2%             |                                                                         | ig, le, others, Confidentiality                                                 |
| Terblanche et al. [18] (2017)         | 66.0%             |                                                                         | di, ig, in, is, le, others                                                      |
| Hajj et al. [19] (2017)               | 92.8%             | Sex, Qualification                                                      | di, ig, le, others, Information                                                 |
| Hammour et al. [20] (2017)            | 50.7%             | Profession                                                              | la, ig, le others, Information                                                  |
| Cheema et al. [21] (2017)             | 60.0%             |                                                                         | co, ig, is, le, others, Information                                             |
| Gurmesa and Dedefo [22] (2016)        | 100.0%            |                                                                         | ig, le, uf, others                                                              |
| Almandil [23] (2016)                  | 82.8%             |                                                                         | ig, others, Confidentiality                                                     |
| Stergiopoulos et al. [24] (2016)      | 43.3%             | Profession                                                              | di, fb, ig, is, le, others, Information                                         |
| Peymani et al. [25] (2016)            | 95.1%             |                                                                         | co, di, ig, le                                                                  |
| Amin et al. [26] (2016)               | 69.5%             |                                                                         | di, ig, le, uf, others                                                          |
| Yu et al. [27] (2016)                 | NM                | Age, Prior Experience with ADR                                          | co, fr, la, ig, is, le, others, Obligation                                      |
| Marques et al. [28] (2016)            | 34.2%             | Workplace                                                               | ig, in, le, Obligation                                                          |
| Cerruti et al. [29] (2016)            | 66.0%             |                                                                         | fe, la, ig, is, le, others                                                      |
| Katusiime et al. [39] (2015)          | 77.2%             | Age, Profession, Years of experience                                    | co, di, fb, fr, la, ig, in, is, le, others, Obligation                          |
| Angelis et al. [31] (2015)            | 73.8%             |                                                                         | fe, ig, in, le, others, Obligation                                              |
| Alshammari et al. [32] (2015)         | 72.0%             |                                                                         | fr, in, is, le                                                                  |
| Nde et al. [33] (2015)                | NM                |                                                                         | ig, uf, others                                                                  |
| Liu et al. [34] (2015)                | 91.2%             | Seniority of position, Training                                         | ig, le, uf, Obligation                                                          |
| Tandon et al. [35] (2015)             | NM                |                                                                         | co, di, ig, in, is, le                                                          |
| Sabblah et al. [36] (2014)            | 86.3%             | Seniority of position, Training, Workplace                              | co, ig, le, uf, others                                                          |
| Kiguba et al. [37] (2014)             | 67.0%             | Age, Speciality, Workplace, Type of health facility (private vs public) | co, fb, la, ig, in, is, le, Obligation                                          |
| Afifi et al. [38] (2014)              | 83.3%             |                                                                         | co, ig, is, le, others                                                          |
| Elkalmi et al. [39] (2014)            | 24.7%             |                                                                         | co, di, la, ig, le, uf, others, Confidentiality                                 |
| Wilbur [40] (2013)                    | 25.0%             | Age, Sex, Practice site (outpatient vs inpatient), Duration of practice | ig                                                                              |
| Sanghavi et al. [41] (2013) a         | 36.4%             |                                                                         | co, di, fr, la, ig, in, is, le, others                                          |
| Stoyanova et al. [42] (2013) a        | 91.0%             |                                                                         | co, di, ig, le, others                                                          |
| Yip et al. [43] (2013)                | 30.2%             | Years of experience, Training location (Europe vs outside Europe)       | di, ig, le, Obligation                                                          |
| Santosh et al. [44] (2013)            | 74.0%             |                                                                         | co, di, am, fe, la, in, is, le, uf                                              |
| Stewart et al. [45] (2013)            | 20.4%             |                                                                         | le, others                                                                      |
| Agarwal et al. [46] (2013)            | 61.0%             | Qualification                                                           | co, di, am, fr, fe, la, ig, in, is, le, uf, others, Obligation, Confidentiality |
| Pimpalkhute et al. [47] (2012)        | 93.3%             |                                                                         | ig, le, uf                                                                      |
| Biagi et al. [48] (2012) a            | 22.8%             |                                                                         | co, di, fr, ig, le, uf, others                                                  |
| Prakasam et al. [49] (2012)           | 53.3%             |                                                                         | co, di, fb, ig, le, Information                                                 |
| Scicchitano et al. [50] (2012)        | NM                |                                                                         | di                                                                              |
| Chopra et al. [51] (2011)             | 100.0%            |                                                                         | ig, le, uf                                                                      |
| Palaian et al. [52] (2011)            | 67.9%             | Sex, Profession                                                         | co, fb, ig                                                                      |
| Oreagba et al. [53] (2011)            | 83.0%             | Years of experience                                                     | fr, ig                                                                          |
| Moumtzoglou [54] (2010)               | NM                |                                                                         | in, le                                                                          |
| Gavaza et al. [55] (2010)             | 16.4%             |                                                                         | di, fb, fr, la, ig, le, uf, others, Information                                 |
| Su et al. [56] (2010)                 | 85.4%             | Age, Workplace, Training                                                | co, la, ig, in, is, le, uf, others                                              |
| Ohaju-Obodo and Iribhogbe [57] (2010) | NM                | Workplace                                                               | ig                                                                              |
| Oshikoya et al. [58] (2009)           | 82.5%             |                                                                         | co, di, fr, fe, ig, is, le                                                      |
| Elnour et al. [59] (2009)             | 79.2%             | Workplace                                                               | co, fr, ig, is, le, others                                                      |
| Vessal et al. [60] (2009)             | 55.0%             |                                                                         | co, di, la, ig, le, uf, Information                                             |
| Ekman and Bäckström [61] (2008)       | 54.0%             |                                                                         | co, di, ig, le, others                                                          |
| Okezie and Olufunmilayo [62] (2008)   | 91.0%             | Graduation University                                                   | di, ig, in, is                                                                  |
| Toklu and Uysal [63] (2008)           | 53.0%             |                                                                         | ig, le, others, Obligation                                                      |
| Gossell-Williams et al. [64] (2008)   | 100.0%            |                                                                         | co, di, le, Confidentiality, Information                                        |
| Irujo et al. [65] (2007)              | 95.0%             |                                                                         | co, di, ig, le, others                                                          |

a) Pre-intervention data (reference data).

b) Article with professionals and patients' information (only the data on professionals is collected).

c) Did not have a Pharmacovigilance System implemented at the time of study.

Co-complacency, Di-diffidence, Fb-feedback, Fe-fear, La-legal aspects, Fr-financial reimbursement, Am-ambition, Ig-ignorance, In-indifference, Is-insecurity, Le-lethargy, Uf-unavailability of the reporting form, NM-not mention.

**Table S3:** Influential factors in adverse drug reactions underreporting

| Author (Year of publication)                | co           | di           | fb           | am           | fr           | fe           | la           | ig           | in           | is           | le           | uf           | Obligation   | Confidentiality | Information  | others       |
|---------------------------------------------|--------------|--------------|--------------|--------------|--------------|--------------|--------------|--------------|--------------|--------------|--------------|--------------|--------------|-----------------|--------------|--------------|
| Haines et al. [1] (2020)                    |              |              |              |              | 23.5%        |              |              | 60.5%        | 19.0%        | 49%          | 39.5%        |              |              |                 |              | 28%          |
| Gidey et al. [2] (2020)                     | 26.7%        | 63.2%        |              |              |              |              |              |              | 33.6%        |              | 61.3%        |              |              |                 |              |              |
| Nadew et al. [3] (2020)                     |              | 93.6%        |              |              |              |              | 51.4%        | 3.9%         | 11.0%        |              | 13.5%        |              | 95.3%        | 8.6%            |              |              |
| Melo et al. [4] (2020)                      |              |              |              |              |              |              |              | 6.9%         |              |              | 18.5%        | 23.4%        |              |                 | 33.7%        | 3.5%         |
| Braiki et al. [5] (2019) <sup>c</sup>       |              |              |              |              |              |              | 86.0%        | 95.0%        |              |              | 86.7%        |              |              |                 |              |              |
| Alemu and Biru [6] (2019)                   | 70.2%        |              |              |              |              | 69.3%        | 51.8%        | 50.0%        | 66.2%        | 53.5%        | 62.3%        | 39.5%        | 73.7%        |                 |              | 36.0%        |
| Le et al. [7] (2019)                        |              |              |              |              | 22.2%        |              | 19.4%        | 55.8%        |              |              | 38.0%        | 36.6%        |              |                 |              |              |
| Kopciuch et al. [8] (2019)                  |              |              |              |              | 25.0%        |              |              | 76.0%        |              |              | 32.0%        | 77.0%        | 12.0%        |                 |              | 37.0%        |
| Hughes and Weiss [9] (2019)                 |              | 15.0%        |              |              |              |              |              | 36.0%        |              |              | 31.0%        | 11.5%        | 12.0%        |                 | 8.0%         | 4.0%         |
| Danekhu et al. [10] (2019)                  |              |              |              |              |              |              |              | 35.9%        |              |              |              |              |              |                 | 17.2%        | 47.0%        |
| Adisa and Omitogun [11] (2019) <sup>b</sup> | 9.4%         |              |              |              |              |              | 3.7%         | 21.1%        |              |              |              | 37.4%        |              |                 |              |              |
| Ergün et al. [12] (2018)                    | 32.5%        | 43.0%        |              |              |              | 53.5%        | 42.5%        | 57.8%        | 37.5%        | 31.0%        | 47.5%        | 46.5%        |              |                 | 38.0%        | 37.5%        |
| Thompson et al. [13] (2018)                 | 2.1%         | 4.6%         |              |              |              |              |              |              |              |              | 3.7%         |              |              |                 | 5.6%         | 2.7%         |
| Li et al. [14] (2018)                       |              |              |              |              | 64.6%        |              |              |              |              |              | 43.5%        |              |              |                 |              | 22.4%        |
| Seid et al. [15] (2018)                     | 21.6%        | 37.3%        |              |              |              |              |              | 52.9%        |              |              | 34.8%        | 51.0%        |              |                 |              | 47.1%        |
| Bahnassi and Al-Harbi [16] (2018)           | 9.6%         |              |              |              |              |              | 12.9%        | 37.8%        |              |              | 46.2%        | 70.2%        |              |                 |              | 7.4%         |
| Lemay et al. [17] (2018)                    |              |              |              |              |              |              |              | 37.7%        |              |              | 11.4%        |              |              | 14.8%           |              | 11.4%        |
| Terblanche et al. [18] (2017)               |              | 22.0%        |              |              |              |              |              | 54.5%        | 22.7%        | 34.1%        | 37.1%        |              |              |                 |              | 32.6%        |
| Hajj et al. [19] (2017)                     |              | 15.0%        |              |              |              |              |              | 23.0%        |              |              | 15.1%        |              |              |                 | 23.2%        | 23.4%        |
| Hammour et al. [20] (2017)                  |              |              |              |              |              |              | 30.9%        | 39.3%        |              |              | 53.5%        |              |              |                 | 68.8%        | 50.9%        |
| Cheema et al. [21] (2017)                   | 37.0%        |              |              |              |              |              |              | 12.3%        |              | 23.9%        | 46.4%        |              |              |                 | 26.8%        | 12.4%        |
| Gurmesa and Dedefo [22] (2016)              |              |              |              |              |              |              |              | 30.8%        |              |              | 25.5%        | 16.5%        |              |                 |              | 11.3%        |
| Almandil [23] (2016)                        |              |              |              |              |              |              |              | 30.7%        |              |              |              |              |              | 10.3%           |              | 9.3%         |
| Stergiopoulos et al. [24] (2016)            |              | 66.0%        | 48.0%        |              |              |              |              | 51.0%        |              | 47.0%        | 63.0%        |              |              |                 | 31.0%        | 45.5%        |
| Peymani et al. [25] (2016)                  | 17.5%        | 6.6%         |              |              |              |              |              | 26.1%        |              |              | 10.8%        |              |              |                 |              |              |
| Amin et al. [26] (2016)                     |              | 86.2%        |              |              |              |              |              | 81.8%        |              |              | 66.3%        | 99.5%        |              |                 |              | 95.5%        |
| Yu et al. [27] (2016)                       | 79.7%        |              |              |              | 39.9%        |              | 16.5%        | 55.6%        |              | 73.3%        | 38.9%        |              | 20.9%        |                 |              | 23.8%        |
| Marques et al. [28] (2016)                  |              |              |              |              |              |              |              | v            | v            |              | v            |              | v            |                 |              |              |
| Cerruti et al. [29] (2016)                  |              |              |              |              |              | 4.0%         | 6.0%         | 19.0%        |              | 41.0%        | 69.0%        |              |              |                 |              | 18.0%        |
| Katusiime et al. [39] (2015)                | 11.7%        | 18.0%        | 48.0%        |              | 38.1%        |              | 17.9%        | 44.1%        | 18.8%        | 28.7%        | 39.9%        |              | 12.1%        |                 |              | 8.1%         |
| Angelis et al. [31] (2015)                  |              |              |              |              |              | 9.2%         |              | 3.6%         | 5.1%         |              | 17.7%        |              | 14.7%        |                 |              | 20.0%        |
| Alshammari et al. [32] (2015)               |              |              |              |              | 39.0%        |              |              |              | 27.3%        | 47.4%        | 47.4%        |              |              |                 |              |              |
| Nde et al. [33] (2015)                      |              |              |              |              |              |              |              | 9.0%         |              |              |              | 11%          |              |                 |              | 4.7%         |
| Liu et al. [34] (2015)                      |              |              |              |              |              |              |              | 47.4%        |              |              | 12.6%        | 13.3%        | 26.7%        |                 |              |              |
| Tandon et al. [35] (2015)                   | 79.3%        | 85.0%        |              |              |              |              |              | 70.2%        | 87.7%        | 79.0%        | 83.7%        |              |              |                 |              |              |
| Sabblah et al. [36] (2014)                  | 16.0%        |              |              |              |              |              |              | 17.0%        |              |              | 9.0%         | 43.1%        |              |                 |              | 9.0%         |
| Kiguba et al. [37] (2014)                   | 61.7%        |              | 45.4%        |              |              |              | 14.3%        | 40.6%        | 16.2%        | 39.8%        | 12.9%        |              | 76.3%        |                 |              |              |
| Afifi et al. [38] (2014)                    | 30.0%        |              |              |              |              |              |              | 40.0%        |              | 14.0%        | 26.0%        |              |              |                 |              | 4.0%         |
| Elkalmi et al. [39] (2014)                  | 44.0%        | 24.0%        |              |              |              |              | 16%          | 43.0%        |              |              | 36.0%        | 52.0%        |              | 17.0%           |              | 33.5%        |
| Wilbur [40] (2013)                          |              |              |              |              |              |              |              | 34.0%        |              |              |              |              |              |                 |              |              |
| Sanghavi et al. [41] (2013) <sup>a</sup>    | 8.8%         | 25.0%        |              |              | 20.0%        |              | 35%          | 60.0%        | 31.3%        | 41.0%        | 43.0%        |              |              |                 |              | 14.0%        |
| Stoyanova et al. [42] (2013) <sup>a</sup>   | 18.8%        | 38.4%        |              |              |              |              |              | 19.4%        |              |              | 12.2%        |              |              |                 |              | 10.0%        |
| Yip et al. [43] (2013)                      |              | 9.2%         |              |              |              |              |              | 7.7%         |              |              | 36.2%        |              | 14.6%        |                 |              |              |
| Santosh et al. [44] (2013)                  | 33.2%        | 34.4%        |              | 21.1%        |              | 24.5%        | 28.8%        |              | 36.4%        | 34.7%        | 36.0%        | 48.1%        |              |                 |              |              |
| Stewart et al. [45] (2013)                  |              |              |              |              |              |              |              |              |              |              | v            |              |              |                 |              | v            |
| Agarwal et al. [46] (2013)                  | 81.9%        | 7.8%         |              | 10.6%        | 20.6%        | 37.5%        | 29.0%        | 56.9%        | 23.5%        | 52.1%        | 40.6%        | 68.9%        | 80.6%        | 46.9%           |              | 47.8%        |
| Pimpalkhute et al. [47] (2012)              |              |              |              |              |              |              |              | 34.0%        |              |              | 22.6%        | 4.76%        |              |                 |              |              |
| Biagi et al. [48] (2012) <sup>a</sup>       | 17.9%        | 29.5%        |              |              | 5.4%         |              |              | 10.5%        |              |              | 22.0%        | 14.3%        |              |                 |              | 26.2%        |
| Prakasam et al. [49] (2012)                 | 52.9%        | 28.2%        | 6.9%         |              |              |              |              | 26.5%        |              |              | 30.5%        |              |              |                 | 22.2%        |              |
| Scicchitano et al. [50] (2012)              |              | 84.0%        |              |              |              |              |              |              |              |              |              |              |              |                 |              |              |
| Chopra et al. [51] (2011)                   |              |              |              |              |              |              |              | 45.0%        |              |              | 20.0%        | 15.0%        |              |                 |              |              |
| Palaian et al. [52] (2011)                  | 14.3%        |              | 10.7%        |              |              |              |              | 14.3%        |              |              |              |              |              |                 |              |              |
| Oreagba et al. [53] (2011)                  |              |              |              |              | 9.6%         |              |              | 44.6%        |              |              |              |              |              |                 |              |              |
| Moumtzoglou [54] (2010)                     |              |              |              |              |              |              |              |              | v            |              | v            |              |              |                 |              |              |
| Gavaza et al. [55] (2010)                   |              | 10.0%        | 13.3%        |              | 3.3%         |              | 10.0%        | 21.7%        |              |              | 18.4%        | 13.3%        |              |                 | 23.3%        | 23.3%        |
| Su et al. [56] (2010)                       | 26.0%        |              |              |              |              |              | 6.7%         | 42.9%        | 5.7%         | 81.9%        | 32.6%        | 30.5%        |              |                 |              | 2.9%         |
| Ohaju-Obodo and Iribhogbe [57] (2010)       |              |              |              |              |              |              |              | 47.4%        |              |              |              |              |              |                 |              |              |
| Oshikoya et al. [58] (2009)                 | 27.2%        | 12.1%        |              |              |              | 15.2%        |              | 36.4%        |              | 47.5%        | 33.3%        |              |              |                 |              |              |
| Elnour et al. [59] (2009)                   | 6.0%         |              |              |              | 4%           |              |              | 27.0%        |              | 15.0%        | 3.0%         |              |              |                 |              | 6.0%         |
| Vessal et al. [60] (2009)                   | 25.0%        | 43.0%        |              |              |              |              | 4.5%         | 4.5%         |              |              | 6.8%         | 23.0%        |              |                 | 13.6%        |              |
| Ekman and Bäckström [61] (2008)             | 68.9%        | 21.9%        |              |              |              |              |              | 19.8%        |              |              | 23.5%        |              |              |                 |              |              |
| Okezie and Olufunmilayo [62] (2008)         |              | 25.6%        |              |              |              |              |              | 69.0%        | 4.3%         | 26.5%        |              |              |              |                 |              |              |
| Toklu and Uysal [63] (2008)                 |              |              |              |              |              |              |              | 14.0%        |              |              | 6.0%         |              | 5.0%         |                 |              | 12.0%        |
| Gossell-Williams et al. [64] (2008)         | 50.0%        | 18.0%        |              |              |              |              |              |              |              |              | 32.0%        |              |              | 12.0%           | 35.0%        |              |
| Irujo et al. [65] (2007)                    | 63.4%        | 32.3%        |              |              |              |              |              | 45.3%        |              |              | 18.2%        |              |              |                 |              | 16.3%        |
| <b>MEDIAN OF RESPONDENTS</b>                | <b>28.6%</b> | <b>26.9%</b> | <b>29.4%</b> | <b>15.9%</b> | <b>22.2%</b> | <b>24.5%</b> | <b>19.5%</b> | <b>37.8%</b> | <b>23.5%</b> | <b>34.4%</b> | <b>33.3%</b> | <b>37.4%</b> | <b>20.9%</b> | <b>13.4%</b>    | <b>23.3%</b> | <b>16.3%</b> |

a) Pre-intervention data (reference data).

b) Article with professionals and patients' information (only the data on professionals is collected).

c) Did not have a Pharmacovigilance System implemented at the time of study.

Co-complacency, Di-diffidence, Fb-feedback, Fe-fear, La-legal aspects, Fr-financial reimbursement, Am-ambition, Ig-ignorance, In-indifference, Is-insecurity, Le-lethargy, Uf-unavailability of the reporting form, NM-not mention

## REFERENCES

1. Haines HM, Meyer JC, Summers RS, Godman BB. Knowledge, attitudes and practices of health care professionals towards adverse drug reaction reporting in public sector primary health care facilities in a South African district. *Eur J Clin Pharmacol.* 2020; 76(7):991-1001.
2. Gidey K, Seifu M, Hailu BY, Asgedom SW, Niriayo YL. Healthcare professionals knowledge, attitude and practice of adverse drug reactions reporting in Ethiopia: a cross-sectional study. *BMJ Open.* 2020; 10(2):e034553.
3. Nadew SS, Beyene KG, Beza SW. Adverse drug reaction reporting practice and associated factors among medical doctors in government hospitals in Addis Ababa, Ethiopia. *PLoS One.* 2020;15(1):1-19.
4. Melo JRR, Duarte EC, de Araújo Ferreira K et al. Under-Reporting of Adverse Drug Reactions among Healthcare Professionals in Brazil: An Estimate Based on National Pharmacovigilance Survey. *Journal of Young Pharmacists* 2020 ; 12(4): 360–65.
5. Braiki R, Douville F, Hasine AB, Souli I. Facteurs liés au signalement des évènements indésirables associés aux soins dans un hôpital tunisien, *Sante Publique.* 2019; 31(4):553-559.
6. Kassa Alemu B, Biru TT. Health Care Professionals' Knowledge, Attitude, and Practice towards Adverse Drug Reaction Reporting and Associated Factors at Selected Public Hospitals in Northeast Ethiopia: A Cross-Sectional Study. *Biomed Res Int.* 2019; 8690546.
7. Le TT, Nguyen TTH, Nguyen C, Tran NH, Tran LA, Nguyen TB, Nguyen N, Nguyen HA. Factors associated with spontaneous adverse drug reaction reporting among healthcare professionals in Vietnam. *J Clin Pharm Ther.* 2020; 45(1):122-127.
8. Kopciuch D, Zaprutko T, Paczkowska A, Ratajczak P, Zielińska-Tomczak Ł, Kus K, Nowakowska E. Safety of medicines-Pharmacists' knowledge, practice, and attitudes toward pharmacovigilance and adverse drug reactions reporting process. *Pharmacoepidemiol Drug Saf.* 2019; 28(12):1543-1551
9. Hughes ML, Weiss M. Adverse drug reaction reporting by community pharmacists-The barriers and facilitators. *Pharmacoepidemiol Drug Saf.* 2019; 28(12):1552-1559.
10. Danekhu K, Shrestha S, Aryal S, Shankar PR. Health-care Professionals' Knowledge and Perception of Adverse Drug Reaction Reporting and Pharmacovigilance in a Tertiary Care Teaching Hospital of Nepal. *Hospital Pharmacy.* 2021; 56(3):178-186.
11. Adisa R, Omitogun TI. Awareness, knowledge, attitude and practice of adverse drug reaction reporting among health workers and patients in selected primary healthcare centres in Ibadan, southwestern Nigeria. *BMC Health Serv Res.* 2019; 19(1):926.
12. Ergün Y, Ergün TB, Toker E, Ünal E, Akben M. Knowledge attitude and practice of Turkish health professionals towards pharmacovigilance in a university hospital. *Int Health.* 2019;11(3):177-184.
13. Thompson A, Randall C, Howard J, Barker C, Bowden D, Mooney P, et al. Nonmedical prescriber experiences of training and competence to report adverse drug reactions in the UK. *J Clin Pharm Ther.* 2019;44(1):78-83.
14. Li R, Curtain C, Bereznicki L, Zaidi STR. Community pharmacists' knowledge and perspectives of reporting adverse drug reactions in Australia: a cross-sectional survey. *Int J Clin Pharm.* 2018;40(4):878-889.

15. Seid MA, Kasahun AE, Mante BM, Gebremariam SN. Healthcare professionals' knowledge, attitude and practice towards adverse drug reaction (ADR) reporting at the health center level in Ethiopia. *Int J Clin Pharm.* 2018;40(4):895-902.
16. Bahnassi A, Al-Harbi F. Syrian pharmacovigilance system: a survey of pharmacists' knowledge, attitudes and practices. *East Mediterr Health J.* 2018;24(6):569-578.
17. Lemay J, Alsaleh FM, Al-Buresli L, Al-Mutairi M, Abahussain EA, Bayoud T. Reporting of Adverse Drug Reactions in Primary Care Settings in Kuwait: A Comparative Study of Physicians and Pharmacists. *Med Princ Pract.* 2018;27(1):30-38.
18. Terblanche A, Meyer JC, Godman B, Summers RS. Knowledge, attitudes and perspective on adverse drug reaction reporting in a public sector hospital in South Africa: baseline analysis. *Hosp Pract (1995).* 2017 ;45(5):238-245.
19. Hajj A, Hallit S, Ramia E, Salameh P; Order of Pharmacists Scientific Committee – Medication Safety Subcommittee. Medication safety knowledge, attitudes and practices among community pharmacists in Lebanon. *Curr Med Res Opin.* 2018; 34(1):149-156.
20. Abu Hammour K, El-Dahiyat F, Abu Farha R. Health care professionals knowledge and perception of pharmacovigilance in a tertiary care teaching hospital in Amman, Jordan. *J Eval Clin Pract.* 2017 ; 23(3):608-613.
21. Cheema E, Haseeb A, Khan TM, Sutcliffe P, Singer DR. Barriers to reporting of adverse drugs reactions: a cross sectional study among community pharmacists in United Kingdom. *Pharmacy Practice* 2017;15(3):931.
22. Gurmessa LT, Dedefo MG. Factors Affecting Adverse Drug Reaction Reporting of Healthcare Professionals and Their Knowledge, Attitude, and Practice towards ADR Reporting in Nekemte Town, West Ethiopia. *Biomed Res Int.* 2016; 2016:5728462.
23. Almandil NB. Healthcare professionals' awareness and knowledge of adverse drug reactions and pharmacovigilance. *Saudi Med J.* 2016;37(12):1359-1364.
24. Stergiopoulos S, Brown CA, Felix T, Grampp G, Getz KA. A Survey of Adverse Event Reporting Practices Among US Healthcare Professionals. *Drug Saf.* 2016;39(11):1117-1127.
25. Peymani P, Tabrizi R, Afifi S, Namazi S, Heydari ST, Shirazi MK, et al. Knowledge, attitude and practice of General Practitioners towards adverse drug reaction reporting in South of Iran, Shiraz (Pharmacoepidemiology report). *Int J Risk Saf Med.* 2016;28(1):25-31.
26. Amin MN, Khan TM, Dewan SM, Islam MS, Moghal MR, Ming LC. Cross-sectional study exploring barriers to adverse drug reactions reporting in community pharmacy settings in Dhaka, Bangladesh. *BMJ Open.* 2016; 6(8):e010912.
27. Yu YM, Lee E, Koo BS, Jeong KH, Choi KH, Kang LK, Lee MS, Choi KH, Oh JM, Shin WG. Predictive Factors of Spontaneous Reporting of Adverse Drug Reactions among Community Pharmacists. *PLoS One.* 2016;11(5):e0155517.
28. Mendes Marques JI, Polónia JM, Figueiras AG, Costa Santos CM, Herdeiro MT. Nurses' attitudes and spontaneous adverse drug reaction reporting: a case-control study in Portugal. *J Nurs Manag.* 2016 ;24(3):409-16.
29. Cerruti L, Lebel D, Bussièrès JF. Perception de la pharmacovigilance par les pharmaciens hospitaliers québécois [Hospital pharmacists' perception of pharmacovigilance in Quebec]. *Ann Pharm Fr.* 2016; 74(2):137-45.
30. Katusiime B, Semakula D, Lubinga SJ. Adverse drug reaction reporting among health care workers at Mulago National Referral and Teaching hospital in Uganda. *Afr Health Sci.* 2015; 15(4):1308-17.

31. De Angelis A, Giusti A, Colaceci S, Vellone E, Alvaro R. Nurses' reporting of suspect adverse drug reactions: a mixed-methods study. *Ann Ist Super Sanita*. 2015;51(4):277-83.
32. Alshammari TM, Alamri KK, Ghawa YA, Alohal NF, Abualkol SA, Aljadhey HS. Knowledge and attitude of health-care professionals in hospitals towards pharmacovigilance in Saudi Arabia. *Int J Clin Pharm*. 2015; 37(6):1104-10.
33. Nde F, Fah AB, Simo FA, Wouessidjewe D. State of knowledge of Cameroonian drug prescribers on pharmacovigilance. *Pan Afr Med J*. 2015;20:70.
34. Liu J, Zhou Z, Yang S, Feng B, Zhao J, Liu H, Huang H, Fang Y. Factors that affect adverse drug reaction reporting among hospital pharmacists in Western China. *Int J Clin Pharm*. 2015;37(3):457-64.
35. Tandon VR, Mahajan V, Khajuria V, Gillani Z. Under-reporting of adverse drug reactions: a challenge for pharmacovigilance in India. *Indian J Pharmacol*. 2015;47(1):65-71.
36. Sabblah GT, Akweongo P, Darko D, Dodoo AN, Sulley AM. Adverse drug reaction reporting by doctors in a developing country: a case study from Ghana. *Ghana Med J*. 2014;48(4):189-93.
37. Kiguba R, Karamagi C, Waako P, Ndagije HB, Bird SM. Recognition and reporting of suspected adverse drug reactions by surveyed healthcare professionals in Uganda: key determinants. *BMJ Open*. 2014;4(11):e005869.
38. Afifi S, Maharloui N, Peymani P, Namazi S, Gharaei AG, Jahani P, Lankarani KB. Adverse drug reactions reporting: pharmacists' knowledge, attitude and practice in Shiraz, Iran. *Int J Risk Saf Med*. 2014;26(3):139-45.
39. Elkalmi RM, Hassali MA, Ibrahim MI, Jamshed SQ, Al-Lela OQ. Community pharmacists' attitudes, perceptions, and barriers toward adverse drug reaction reporting in Malaysia: a quantitative insight. *J Patient Saf*. 2014;10(2):81-7.
40. Wilbur K. Pharmacovigilance in Qatar: a survey of pharmacists. *East Mediterr Health J*. 2013;19(11):930-5.
41. Sanghavi DR, Dhande PP, Pandit VA. Perception of pharmacovigilance among doctors in a tertiary care hospital: influence of an interventional lecture. *Int J Risk Saf Med*. 2013;25(4):197-204.
42. Stoynova V, Getov IN, Naseva EK, Lebanova HV, Grigorov EE. Physicians' knowledge and attitude towards adverse event reporting system and result to intervention--randomized nested trial among Bulgarian physicians. *Med Glas (Zenica)*. 2013; 10(2):365-72.
43. Yip J, Radford DR, Brown D. How do UK dentists deal with adverse drug reaction reporting? *Br Dent J*. 2013; 214(8): E22.
44. Santosh KC, Tragulpiankit P, Gorsanan S, Edwards IR. Attitudes among healthcare professionals to the reporting of adverse drug reactions in Nepal. *BMC Pharmacol Toxicol*. 2013; 14:16.
45. Stewart D, MacLure K, Paudyal V, Hughes C, Courtenay M, McLay J. Non-medical prescribers and pharmacovigilance: participation, competence and future needs. *Int J Clin Pharm*. 2013; 35(2):268-74.
46. Agarwal R, Daher AM, Mohd Ismail N. Knowledge, practices and attitudes towards adverse drug reaction reporting by private practitioners from Klang valley in Malaysia. *Malays J Med Sci*. 2013; 20(2):52-61.

47. Pimpalkhute SA, Jaiswal KM, Sontakke SD, Bajait CS, Gaikwad A. Evaluation of awareness about pharmacovigilance and adverse drug reaction monitoring in resident doctors of a tertiary care teaching hospital. *Indian J Med Sci.* 2012; 66(3-4):55-61.
48. Biagi C, Montanaro N, Buccellato E, Roberto G, Vaccheri A, Motola D. Underreporting in pharmacovigilance: an intervention for Italian GPs (Emilia-Romagna region). *Eur J Clin Pharmacol.* 2013; 69(2):237-44.
49. Prakasam A, Nidamanuri A, Kumar S. Knowledge, perception and practice of pharmacovigilance among community pharmacists in South India. *Pharmacy Practice (Internet)* 2012; 10(4):222-226.
50. Giofrè C, Scicchitano F, Palleria C, Mazzitello C, Ciriaco M, Gallelli L, et al. Pharmacovigilance and drug safety in Calabria (Italy): 2012 adverse events analysis. *J Pharmacol Pharmacother.* 2013; 4(Suppl 1):S55-60.
51. Chopra D, Wardhan N, Rehan HS. Knowledge, attitude and practices associated with adverse drug reaction reporting amongst doctors in a teaching hospital. *Int J Risk Saf Med.* 2011;23(4):227-32
52. Palaian S, Ibrahim MI, Mishra P. Health professionals' knowledge, attitude and practices towards pharmacovigilance in Nepal. *Pharmacy Practice (Internet)* 2011; 9(4):228-235.
53. Oreagba IA, Ogunleye OJ, Olayemi SO. The knowledge, perceptions and practice of pharmacovigilance amongst community pharmacists in Lagos state, south west Nigeria. *Pharmacoepidemiol Drug Saf.* 2011; 20(1):30-5.
54. Moutzoglou A. Factors that prevent physicians reporting adverse events. *Int J Health Care Qual Assur.* 2010;23(1):51-8.
55. Gavaza P, Brown CM, Khoza S. Texas pharmacists' opinions on reporting serious adverse drug events to the Food and Drug Administration: a qualitative study. *Pharm World Sci.* 2010; 32(5):651-7.
56. Su C, Ji H, Su Y. Hospital pharmacists' knowledge and opinions regarding adverse drug reaction reporting in Northern China. *Pharmacoepidemiol Drug Saf.* 2010; 19(3):217-22.
57. Ohaju-Obodo JO, Iribhogbe OI. Extent of pharmacovigilance among resident doctors in Edo and Lagos states of Nigeria. *Pharmacoepidemiol Drug Saf.* 2010;19(2):191-5.
58. Oshikoya KA, Awobusuyi JO. Perceptions of doctors to adverse drug reaction reporting in a teaching hospital in Lagos, Nigeria. *BMC Clin Pharmacol.* 2009;9:14.
59. Elnour AA, Ahmed AD, Yousif MA, Shehab A. Awareness and reporting of adverse drug reactions among health care professionals in Sudan. *Jt Comm J Qual Patient Saf.* 2009;35(6):324-9.
60. Vessal G, Mardani Z, Mollai M. Knowledge, attitudes, and perceptions of pharmacists to adverse drug reaction reporting in Iran. *Pharm World Sci.* 2009;31(2):183-7.
61. Ekman E, Bäckström M. Attitudes among hospital physicians to the reporting of adverse drug reactions in Sweden. *Eur J Clin Pharmacol.* 2009;65(1):43-6.
62. Okezie EO, Olufunmilayo F. Adverse drug reactions reporting by physicians in Ibadan, Nigeria. *Pharmacoepidemiol Drug Saf.* 2008;17(5):517-22.
63. Toklu HZ, Uysal MK. The knowledge and attitude of the Turkish community pharmacists toward pharmacovigilance in the Kadikoy district of Istanbul. *Pharm World Sci.* 2008;30(5):556-62.
64. Gossell-Williams, Maxine, and Sarafadeen A. Adebayo. The Pharmwatch Programme: Challenges to Engaging the Community Pharmacists in Jamaica. *Pharmacy Practice* 2008; 6(4): 187–90.



65. Irujo M, Beitia G, Bes-Rastrollo M, Figueiras A, Hernández-Díaz S, Lasheras B. Factors that influence under-reporting of suspected adverse drug reactions among community pharmacists in a Spanish region. *Drug Saf.* 2007; 30(11):1073-82.
